# Supplementary material
Source: PubMed Central journal article supplement (PMC7589076)
Supplement: jamapediatr-e203383-s001.pdf [file jamapediatr-e203383-s001.pdf]

1 **INTRAVENOUS FLUID THERAPY IN CHILDREN – A RANDOMIZED AND**  
2 **CONTROLLED CLINICAL STUDY OF THE EFFECTS OF FLUID THERAPY ON**  
3 **ELECTROLYTE LEVELS**

4

5 *Original Study Protocol and Statistical Analysis Plan*

6

7

8

9 Saara Lehtiranta<sup>1,2</sup>, MD, Doctoral student, Pediatric resident

10 Minna Honkila<sup>1,2</sup>, MD, PhD, Specialist in pediatrics

11 Merja Kallio<sup>1,2</sup>, MD, PhD, Specialist in pediatrics, Pediatric cardiologist

12 Niko Paalanne<sup>1,2</sup>, MD, PhD, Specialist in pediatrics

13 Outi Peltoniemi<sup>1,2</sup>, Docent, Specialist in pediatrics

14 Tytti Pokka<sup>1,2</sup>, Biostatistician

15 Marjo Renko<sup>3</sup>, Professor of Pediatrics, Specialist in pediatrics, Specialist in pediatric infections

16 Terhi Tapiainen<sup>1,2</sup>, Associate Professor of Pediatrics, Principal investigator

17

18 <sup>1</sup>Oulu University Hospital, Department of Children and Adolescents, University of Oulu

19 <sup>2</sup>PEDEGO Research Unit and MRC Oulu

20 <sup>3</sup>University of Eastern Finland

21

22 Contact information:

23

24 Terhi Tapiainen

25 Department of Pediatrics and Adolescent Medicine

26 Oulu University Hospital

27 PO Box 23

28 90029 Oulu

29 [terhi.tapiainen@oulu.fi](mailto:terhi.tapiainen@oulu.fi)

30 Telephone: +358 40 70 546 77, +358 8 315 5185

31 **BACKGROUND**

32 *Fluid therapy in children: historical background and feared complications*

33 For more than 50 years, the daily fluid requirement in children has been calculated with the formula  
34 developed by Malcolm Holliday and William Segar, which is based on energy expenditure in  
35 relation to weight in healthy children. The amounts of electrolytes added to the fluid are determined  
36 based on the amount of electrolytes in breast milk and cow's milk. When calculated with the  
37 Holliday-Segar formula, intravenous fluids are inevitably hypotonic, i.e. with a lower concentration  
38 of sodium compared to plasma (Kataja 2015). The safety of hypotonic fluids, particularly in  
39 intravenous fluid therapy of sick children, has given rise to debate in recent years. A healthy body is  
40 able to eliminate any excess water due to IV therapy via kidneys, but in sick children, activated  
41 secretion of antidiuretic hormone (ADH) may cause accumulation of fluid in the body, which  
42 results in hyponatremia (Kataja 2015, Wang et al. 2014). Potential and even life-threatening  
43 complications of severe hyponatremia include seizures and hyponatremic encephalopathy (Moritz  
44 & Ayus 2010, Sarnaik et al. 1991).

45  
46 *Previous randomized controlled clinical studies*

47 In recent years, several randomized and controlled studies have been conducted comparing isotonic  
48 (having the same sodium concentration as plasma) and hypotonic solutions in maintenance fluid  
49 therapy in children (Pemde et al. 2015, Shamim et al. 2014, Choong et al. 2011, Rey et al. 2011,  
50 Saba et al. 2011, Kannan et al. 2010, Yung & Keeley 2009). Based on the studies, isotonic solutions  
51 cause less hyponatremia than hypotonic solutions. In addition, the results show that isotonic  
52 solutions are safe in maintenance fluid therapy in children. However, the generalizability of the  
53 results in question to normal pediatric patient populations is complicated by the fact that the studies  
54 have mostly included pediatric patients in intensive care as well as post-operative patients.  
55 Furthermore, the comparator used in most studies was 0.18% saline, which has a sodium  
56 concentration of only 31 mmol/L (Pemde et al. 2015, Shamim et al. 2014, Kannan et al. 2010, Yung  
57 & Keeley 2009).

58 Evidence of the superiority of isotonic fluids in general pediatric patients with  
59 common upper and lower respiratory infections and acute gastroenteritis is scarce, as pointed out by  
60 Foster et al. (2014) in their recent systematic review and meta-analysis. Friedman et al. (2015)  
61 compared isotonic and hypotonic solution in a sample of 110 general pediatric patients; based on  
62 the results, there was no statistically significant difference between the groups in hyponatremia or in  
63 any other endpoints. The study of Neville et al. (2006) included 102 children with acute  
64 gastroenteritis. The results showed that compared to hypotonic fluid, isotonic fluid therapy caused  
65 statistically significantly less hyponatremia, but on clinical evaluation, the differences in sodium  
66 levels following the fluid therapy were quite small. A similar finding in favor of isotonic fluid was  
67 also made by McNab et al. (2015) in a large randomized study with 676 pediatric patients.  
68 However, less than half of the patients in their study were general pediatric patients.

69  
70

71 ***Problems with implementation of fluid therapy***

72 Isotonic fluid therapy is usually implemented with so-called readymade solutions. Isotonic ready-  
73 made solutions contain almost the same amount of sodium and potassium as human plasma. In  
74 traditional maintenance fluid therapy in children calculated with the Holliday-Segar formula, on  
75 average 20 mmol/L potassium is added to fluids. The addition of potassium is considered  
76 particularly important in the case of acute gastroenteritis because there may be a substantial loss of  
77 potassium if the infection persists for several days. There is thus a potential risk of hypokalemia  
78 when using isotonic solutions that contain low levels of potassium in IV fluid therapy. In the study  
79 of McNab et al. (2015), extra potassium was added to the fluids for 13% of the patients.

80

81 **AIM OF THE STUDY**

82 The aim of the randomized clinical study is to compare two alternative intravenous fluid products in  
83 the fluid therapy of acutely sick children. The first IV fluid is a readymade isotonic solution,  
84 Plasmalyte Glucos 50 mg/mL, which contains sodium 140 mmol/L, potassium 5 mmol/L, and  
85 chloride 98 mmol/L. The second is a 5% glucose solution which is a semi-physiological fluid in  
86 terms of sodium, containing sodium chloride 80 mmol/L and potassium chloride 20 mmol/L.

87

88 **COURSE OF THE STUDY**

89 The study is a prospective, randomized and controlled clinical treatment trial. Patients are recruited  
90 to the study by pediatric residents and specialists working in the pediatric ER. The doctors who  
91 recruit patients to the study tell about the study to the children and patients. They also hand out an  
92 information and consent document and a form with basic information for them to complete. The  
93 signed consent forms are stored in the upper cabinet in the doctor's office in the ER.

94

95 *i. Randomization*

96 The patients who have or whose parents have given a written consent to participate in  
97 the study are randomized into two groups. The following treatments are compared:

- 98 • Isotonic fluid (readymade solution Plasmalyte Glucos 50 mg/mL, with Na 140  
99 mmol/L, K 5 mmol/L and Cl 98 mmol/L)
- 100 • Semi-physiological fluid (G5%, to which NaCl 80 mmol/L and KCl 20 mmol/L is  
101 added)

102 The current standard of care is based on a local model which has not been scientifically  
103 evaluated and is associated with a significant possibility for calculation errors, as shown  
104 by a survey we conducted among the physicians in our clinic. The current standard of  
105 care is thus not comparable in this study as its safety has not been established and it is  
106 not evidence-based.

107 *ii. Blinding*

108 This is an open label study because the endpoints can be objectively measured. Thanks  
109 to the open label design, the treating physician is also aware of the electrolyte  
110 concentrations of the fluids and can make adjustments to them if necessary.

111 *iii. Endpoints*

- 112 • Primary: hypokalemia < 3.5
- 113 • Secondary: hyponatremia (< 132), hypernatremia (> 148), weight gain, change of  
114 maintenance fluid, added sodium and potassium, duration of fluid therapy during

115 hospital treatment within 7 days of admittance, admittance to intensive care, duration  
116 of hospital treatment

117 *iv. Measures to prevent adverse effects*

118 Before the onset of fluid therapy, blood electrolytes are measured from venous blood  
119 samples taken in connection with cannula insertion from all patients taking part in the  
120 study. In all patients, electrolytes are analyzed from venous blood samples taken in the  
121 morning while in hospital. Based on the assessment of the physician on call, electrolytes  
122 can be measured in the evening as well, especially if the patient has repeated fluid loss  
123 during the treatment, or if the time between the onset of fluid therapy and the blood  
124 sampling the next morning is long. Any other additional blood samples required can be  
125 taken as capillary samples. The treating physician has the right to withdraw  
126 administration of study fluid and treat the patient with the fluids he/she considers best.  
127 The treating physician may also increase or decrease the amount of electrolytes in the  
128 fluid.

129

130 **STUDY POPULATION**

131

132 *i. Inclusion criteria:*

- 133 • Age  $\geq$  6 months and  $<$  12 years
- 134 • Need of hospital treatment and IV rehydration in any pediatric ward

135 *ii. Exclusion criteria:*

- 136 • Na  $<$  130 or  $>$  150
- 137 • K  $<$  3
- 138 • Need of 10% glucose solution as initial fluid
- 139 • Diabetes
- 140 • Diabetes insipidus
- 141 • Ketoacidosis
- 142 • Kidney disease requiring dialysis
- 143 • Severe liver disease
- 144 • Metabolic disease that requires rehydration according to protocol
- 145 • Leukemia or other malignancy that requires rehydration according to protocol

146 *iii. Sample size*

147 Based on previous studies, we estimate that the prevalence of hypokalemia is about 13%  
148 in patients who receive isotonic maintenance fluids that do not contain, or contain only  
149 small amounts of potassium. In our study, a reduction in prevalence to 6% in the group  
150 where maintenance fluid therapy is given using semi-physiological fluid that contains  
151 potassium is considered clinically significant. We set alpha at 5% and power at 80%,  
152 which means that we need 275 children/group. To make sure that the final analysis  
153 includes the required number of children, we chose 305 children/group (a total of 610  
154 children) as sample size.

155

156

157

158 **FOLLOW-UP AND LABORATORY SAMPLES**

- 159 • Before the onset of fluid therapy, sodium and potassium are measured from a venous blood  
160 sample taken in connection with cannula insertion from all patients taking part in the study.  
161 During fluid therapy, sodium and potassium are determined from a venous blood sample  
162 taken in the morning. The time of onset of study fluid administration differs between the  
163 study patients, which is why the venous blood samples are also taken at different times in  
164 the morning. However, in a randomized study design this is not a problem; the groups are  
165 still comparable. Based on the assessment of the physician on call, electrolytes can be  
166 measured in the evening as well, especially if the patient has repeated fluid loss during the  
167 treatment, or if the time between the onset of fluid therapy and the blood sampling the next  
168 morning is long.
- 169 • The study patients are weighed before the onset of fluid therapy, in the morning following  
170 the onset of fluid therapy, and after the fluid therapy has ended.
- 171 • Pathogens are investigated according to current practice in all patients with infections. In  
172 patients with acute gastroenteritis, the presence of adeno, rota and noro viruses in the feces  
173 is investigated. Patients with respiratory infections are investigated for the presence of  
174 influenza and RSV virus; if necessary, a more extensive viral analysis of a nasopharyngeal  
175 sample is undertaken.
- 176 • The following are recorded in the medical record: fever, oral fluid therapy, IV fluid therapy,  
177 vomiting, diarrhea and weight (every morning and at discharge). At the end of the treatment  
178 period, the recordings of oral and IV fluids are scanned into the medical record.
- 179 • Data on patients entering the study is collected regularly (weekly) by investigators from  
180 medical records and entered into SPSS.

181

182 **FLUID PRODUCTS AND THEIR ADMINISTRATION**

183 Plasmalyte Glucos 50 mg/mL contains sodium 140 mmol/l, potassium 5 mmol/L, chloride 98  
184 mmol/L, magnesium 1.5 mmol/L, acetate 27 mmol/L and gluconate 23 mmol/L. Plasmalyte Glucos  
185 50 mg/mL has a pH of about 7.4 (6.5–8.0). The semi-physiological fluid is made with 5% glucose  
186 with the addition of sodium chloride 80 mmol/L and potassium chloride 20 mmol/L. The amount of  
187 fluid and the infusion rate are calculated based on the child's weight using the Formula of Holliday-  
188 Segar (fluid requirement 100 mL/kg <10 kg, 1,000 mL + 50 mL/kg > 10 kg, > 20 kg 1,500 ml + 20  
189 mL/kg > 20 kg). Potential correction of dehydration is calculated based on estimated weight loss.  
190 Based on assessment by the physician on call, fluid replacement with 20 mg/kg Ringer solution  
191 may be given before the onset of study fluid administration for the study patients.

192

193 **STATISTICAL ANALYSIS PLAN**

194 **The primary outcome** is defined as the proportion of children with any clinically significant  
195 electrolyte disorder defined as hypokalemia < 3.5 mmol/L, hyponatremia < 132 mmol/L, or  
196 hypernatremia > 148 mmol/L within 7 days of randomization. **The main secondary outcome** is  
197 fluid retention measured by weight change (g) during hospitalization: weight (g) at discharge -  
198 weight (g) on admission. **Other secondary outcomes** are the duration of intravenous fluid therapy  
199 (hours), proportion of children requiring any change of fluid therapy, proportion of children  
200 admitted to intensive care after admission, duration of hospitalization, proportion of children with

201 mild hyponatremia defined as plasma sodium 132-135 mmol/L, and severe hypokalemia < 3.0  
202 mmol/L. All secondary outcomes were reported within 7 days after randomization except the  
203 number of deaths within 30 days of randomization.

204

205 The occurrence of any clinically significant electrolyte disorder in children receiving isotonic fluid  
206 therapy was estimated to be at least 13% based on a previous study reporting the need of adding  
207 potassium in plasma-like fluid in children (17). We considered the difference between groups to be  
208 clinically significant if the occurrence of electrolyte disorder would be 7% lower in children  
209 receiving moderately hypotonic fluid. We set alpha error at 5% and beta error at 20%, i.e. power of  
210 80%, which resulted in 275 children/group. To make sure that the final analysis included the  
211 required number of children with measured primary outcome, we decided to recruit 300  
212 children/group.

213

214 All analyses were performed in intention-to-treat population. Only primary and secondary outcomes  
215 that were prespecified in the protocol and statistical analysis plan before study completion will be  
216 compared. As all study participants were hospitalized, missing data were rare. Differences between  
217 proportions will be compared with standard normal deviate test (SND test) and 95% CI of the  
218 difference will be given to readers. Risk ratios (RR) will be calculated for the outcomes. We will  
219 calculate the number needed to treat to avoid one patient developing a clinically significant  
220 electrolyte disorder (NNT) in children receiving semi isotonic fluid therapy presented as number  
221 needed to harm (NNH) if isotonic fluid therapy increased the risk. Continuous variables will be  
222 compared with t test and 95% CI of the difference will be given to readers. For primary and  
223 secondary outcomes, we will calculate 95% confidence intervals (CIs) of the differences. The widths  
224 of CI intervals of prespecified secondary outcomes will not be adjusted for multiplicity and  
225 therefore will not be interpreted as definite treatment effects. All analyses will be performed using  
226 IBM Statistics for Windows version 25 (Armonk, NY: IBM Corp.) and StatsDirect statistical  
227 software version 3 (StatsDirect Ltd, England). Figures were drawn using OriginPro 2018 software  
228 (OriginLab Corporation, Northampton, MA, USA).

229

## 230 **STUDY ORGANIZATION, FUNDING AND SCHEDULE**

231 The study is an independent investigator-driven study. Saara Lehtiranta, MD, is a pediatric resident.  
232 In addition to her day job, she does research on fluid therapy in children at the Department of  
233 Children and Adolescents of Oulu University Hospital under the guidance of Docent Terhi  
234 Tapiainen, Ass. Professor of Pediatrics, Oulu University Hospital. All members of the study team  
235 are employed in the units indicated on the title page. Funding is applied from various foundations to  
236 enable personal full-time research months (Saara Lehtiranta, MD). The study commenced in spring  
237 2016 and is expected to last 1.5–2 years.

238

239

## 240 **ETHICAL CONSIDERATIONS AND STUDY REGISTRATION**

241 For decades, hypotonic solutions calculated with the Holliday-Segar formula have been used in  
242 fluid therapy in children, and in many pediatric units they are still the current standard of care.  
243 However, fluid calculation is a cumbersome process that is prone to errors. In addition, cases of

244 hyponatremia caused by hypotonic fluids have been described in the literature. In recent years, there  
245 have been several randomized controlled studies on the use of isotonic fluids in pediatric patients.  
246 Based on the findings, the use of isotonic solutions has been considered safe in the maintenance  
247 fluid therapy in children, particularly IC and surgical patients. Based on this evidence, some  
248 pediatric units have already switched to using isotonic fluids in maintenance fluid therapy in all  
249 pediatric patients. Semi-physiological fluids have been commonly used in maintenance fluid  
250 therapy in children, and their use has not been associated with severe or clinically significant  
251 hyponatremia in previous studies.

252           The use of standardized fluids, i.e. isotonic readymade fluids and predetermined semi-  
253 physiological fluid as study products is well-motivated from the viewpoint of patient safety: the less  
254 the on-call physician needs to focus on calculating the amount of electrolytes to be added to fluids,  
255 the smaller the risk of miscalculation. However, there are still only few studies comparing different  
256 maintenance fluids, and in selected patient populations only. Above all, well-executed, randomized  
257 and controlled studies on maintenance fluid therapy in children with common infections are needed  
258 before deciding what kind of fluid therapy requiring less calculation should be adopted more  
259 widely.

260           Compared with current treatment, the use of the readymade fluids in the study is not  
261 expected to cause any risks, such as electrolyte impairment, longer treatment time or other  
262 complications. The study is an open label study, so the doctors treating the study patients are aware  
263 of the fluid solutions used and their electrolyte contents. The blood electrolyte levels of the study  
264 patients are monitored in accordance with the study protocol as well as whenever necessary, so that  
265 any disturbances in electrolyte levels can be addressed rapidly.

266  
267

268 **CLINICAL SIGNIFICANCE OF THE STUDY**

269 The study provides new information about the selection and safety of IV fluids for children with  
270 common pediatric diseases, such as acute upper and lower respiratory infections and gastroenteritis.  
271 A switch to readymade solutions would also facilitate the work of on-call physicians, reduce the  
272 risk of calculation errors, and allow physicians more time to focus on patient care instead of fluid  
273 calculation.

274

275

276 **REFERENCES**

277

278 Choong K, Arora S, Cheng J, Farrokhyar F, Reddy D, Thabane L, Walton JM. Hypotonic versus  
279 isotonic maintenance fluids after surgery for children: a randomized controlled trial. *Pediatrics*  
280 2011;128(5):857-66.

281

282 Foster BA, Tom D, Hill V. Hypotonic versus isotonic fluids in hospitalized children: a systematic  
283 review and meta-analysis. *J Pediatr* 2014;165(1):163-169

284

285 Friedman JN, Beck CE, DeGroot J, Geary DF, Sklansky DJ, Freedman SB. Comparison of isotonic  
286 and hypotonic intravenous maintenance fluids: a randomized clinical trial. *JAMA Pediatr*  
287 2015;169(5):445-51.

288

289 Kannan L, Lodha R, Vivekanandhan S, Bagga A, Kabra SK, Kabra M. Intravenous fluid regimen  
290 and hyponatraemia among children: a randomized controlled trial. *Pediatr Nephrol*  
291 2010;25(11):2303-9.

292

293 Kataja J. Onko jo aika muuttaa lasten ylläpitonestehoidon käytäntöä? *Suomen Lääkärilehti*  
294 2015;70(20):1403-1408.(article in Finnish)

295

296 McNab S, Duke T, South M, Babl FE, Lee KJ, Arnup SJ, Young S, Turner H, Davidson A. 140  
297 mmol/L of sodium versus 77 mmol/L of sodium in maintenance intravenous fluid therapy for  
298 children in hospital (PIMS): a randomised controlled double-blind trial. *Lancet*  
299 2015;385(9974):1190-7.

300

301 Moritz ML, Ayus JC. New aspects in the pathogenesis, prevention, and treatment of hyponatremic  
302 encephalopathy in children. *Pediatr Nephrol* 2010;25(7):1225-38.

303

304 Neville KA, Verge CF, Rosenberg AR, O'Meara MW, Walker JL. Isotonic is better than hypotonic  
305 saline for intravenous rehydration of children with gastroenteritis: a prospective randomised study.  
306 *Arch Dis Child* 2006;91(3):226-32.

307

308 Pemde HK, Dutta AK, Sodani R, Mishra K. Isotonic intravenous maintenance fluid reduces hospital  
309 acquired hyponatremia in young children with central nervous system infections. *Indian J Pediatr*  
310 2015;82(1):13-8.

311



312 Rey C, Los-Arcos M, Hernández A, Sánchez A, Díaz JJ, López-Herce J. Hypotonic versus isotonic  
313 maintenance fluids in critically ill children: a multicenter prospective randomized study. *Acta*  
314 *Paediatr* 2011;100(8):1138-43.  
315  
316 Saba TG, Fairbairn J, Houghton F, Laforte D, Foster BJ. A randomized controlled trial of isotonic  
317 versus hypotonic maintenance intravenous fluids in hospitalized children. *BMC Pediatr* 2011;11:82.  
318  
319 Sarnaik AP1, Meert K, Hackbarth R, Fleischmann L. Management of hyponatremic seizures in  
320 children with hypertonic saline: a safe and effective strategy. *Crit Care Med* 1991;19(6):758-62.  
321  
322 Shamim A, Afzal K, Ali SM. Safety and efficacy of isotonic (0.9%) vs. hypotonic (0.18%) saline as  
323 maintenance intravenous fluids in children: a randomized controlled trial. *Indian Pediatr*  
324 2014;51(12):969-74.  
325  
326 Wang J, Xu E, Xiao Y. Isotonic versus hypotonic maintenance IV fluids in hospitalized children: a  
327 meta-analysis. *Pediatrics* 2014;133(1):105-13.  
328  
329 Yung M, Keeley S. Randomised controlled trial of intravenous maintenance fluids. *J Paediatr Child*  
330 *Health* 2009;45(1-2):9-14.

331  
332 **INTRAVENOUS FLUID THERAPY IN CHILDREN – A RANDOMIZED AND**  
333 **CONTROLLED CLINICAL STUDY OF THE EFFECTS OF FLUID THERAPY ON**  
334 **ELECTROLYTE LEVELS**  
335

336 *Final Study Protocol and Statistical Analysis Plan*  
337  
338

339 Saara Lehtiranta<sup>1,2</sup>, MD, Doctoral student, Pediatric resident  
340 Minna Honkila<sup>1,2</sup>, MD, PhD, Specialist in pediatrics  
341 Merja Kallio<sup>1,2</sup>, MD, PhD, Specialist in pediatrics, Pediatric cardiologist  
342 Niko Paalanne<sup>1,2</sup>, MD, PhD, Specialist in pediatrics  
343 Outi Peltoniemi<sup>1,2</sup>, Docent, Specialist in pediatrics  
344 Tytti Pokka<sup>1,2</sup>, Biostatistician  
345 Marjo Renko<sup>3</sup>, Professor of Pediatrics, Specialist in pediatrics, Specialist in pediatric infections  
346 Terhi Tapiainen<sup>1,2</sup>, Associate Professor of Pediatrics, Principal investigator  
347

348 <sup>1</sup>Oulu University Hospital, Department of Children and Adolescents, University of Oulu

349 <sup>2</sup>PEDEGO Research Unit and MRC Oulu

350 <sup>3</sup>University of Eastern Finland

351

352 Contact information:

353

354 Terhi Tapiainen

355 Department of Pediatrics and Adolescent Medicine

356 Oulu University Hospital

357 PO Box 23

358 90029 Oulu

359 terhi.tapiainen@oulu.fi

360 Telephone: +358 40 70 546 77, +358 8 315 5185

361 **BACKGROUND**

362 *Fluid therapy in children: historical background and feared complications*

363 For more than 50 years, the daily fluid requirement in children has been calculated with the formula  
364 developed by Malcolm Holliday and William Segar, which is based on energy expenditure in  
365 relation to weight in healthy children. The amounts of electrolytes added to the fluid are determined  
366 based on the amount of electrolytes in breast milk and cow's milk. When calculated with the  
367 Holliday-Segar formula, intravenous fluids are inevitably hypotonic, i.e. with a lower concentration  
368 of sodium compared to plasma (Kataja 2015). The safety of hypotonic fluids, particularly in  
369 intravenous fluid therapy of sick children, has given rise to debate in recent years. A healthy body is  
370 able to eliminate any excess water due to IV therapy via kidneys, but in sick children, activated  
371 secretion of antidiuretic hormone (ADH) may cause accumulation of fluid in the body, which  
372 results in hyponatremia (Kataja 2015, Wang et al. 2014). Potential and even life-threatening  
373 complications of severe hyponatremia include seizures and hyponatremic encephalopathy (Moritz  
374 & Ayus 2010, Sarnaik et al. 1991).

375  
376 *Previous randomized controlled clinical studies*

377 *Addition Aug 2019: Full updated literature review is presented as a separate summary table.* In  
378 recent years, several randomized and controlled studies have been conducted comparing isotonic  
379 (having the same sodium concentration as plasma) and hypotonic solutions in maintenance fluid  
380 therapy in children (Pemde et al. 2015, Shamim et al. 2014, Choong et al. 2011, Rey et al. 2011,  
381 Saba et al. 2011, Kannan et al. 2010, Yung & Keeley 2009). Based on the studies, isotonic solutions  
382 cause less hyponatremia than hypotonic solutions. In addition, the results show that isotonic  
383 solutions are safe in maintenance fluid therapy in children. However, the generalizability of the  
384 results in question to normal pediatric patient populations is complicated by the fact that the studies  
385 have mostly included pediatric patients in intensive care as well as post-operative patients.  
386 Furthermore, the comparator used in most studies was 0.18% saline, which has a sodium  
387 concentration of only 31 mmol/L (Pemde et al. 2015, Shamim et al. 2014, Kannan et al. 2010, Yung  
388 & Keeley 2009).

389 Evidence of the superiority of isotonic fluids in general pediatric patients with  
390 common upper and lower respiratory infections and acute gastroenteritis is scarce, as pointed out by  
391 Foster et al. (2014) in their recent systematic review and meta-analysis. Friedman et al. (2015)  
392 compared isotonic and hypotonic solution in a sample of 110 general pediatric patients; based on  
393 the results, there was no statistically significant difference between the groups in hyponatremia or in  
394 any other endpoints. The study of Neville et al. (2006) included 102 children with acute  
395 gastroenteritis. The results showed that compared to hypotonic fluid, isotonic fluid therapy caused  
396 statistically significantly less hyponatremia, but on clinical evaluation, the differences in sodium  
397 levels following the fluid therapy were quite small. A similar finding in favor of isotonic fluid was  
398 also made by McNab et al. (2015) in a large randomized study with 676 pediatric patients.  
399 However, less than half of the patients in their study were general pediatric patients.

400  
401

402 ***Problems with implementation of fluid therapy***

403 Isotonic fluid therapy is usually implemented with so-called readymade solutions. Isotonic ready-  
404 made solutions contain almost the same amount of sodium and potassium as human plasma. In  
405 traditional maintenance fluid therapy in children calculated with the Holliday-Segar formula, on  
406 average 20 mmol/L potassium is added to fluids. The addition of potassium is considered  
407 particularly important in the case of acute gastroenteritis because there may be a substantial loss of  
408 potassium if the infection persists for several days. There is thus a potential risk of hypokalemia  
409 when using isotonic solutions that contain low levels of potassium in IV fluid therapy. In the study  
410 of McNab et al. (2015), extra potassium was added to the fluids for 13% of the patients.

411

412 ***Addition 4 Feb 2019: Measurement of copeptin and its use in fluid therapy***

413 *The optimal implementation of fluid therapy in acutely sick children is not known because fluid*  
414 *therapy is influenced by the degree of dehydration, renal function, and hormones that regulate fluid*  
415 *balance. In recent years, increasing attention has been focused on the risk of severe hypernatremia*  
416 *in sick patients who may have abnormally high secretion of antidiuretic hormone (ADH) in acute*  
417 *illness. According to this view, the use of isotonic, i.e. high-sodium fluid therapy would be safe as it*  
418 *prevents the severe hyponatremia associated with high secretion of ADH. However, based on a*  
419 *study in healthy adults, isotonic fluid therapy may lead to fluid retention and decreased diuresis*  
420 *(Van Regenmortel et al. 2017). In addition, animal studies have revealed that increased ADH level*  
421 *may mediate renal damage if dehydration is corrected with fluids that contain fructose (Garcia-*  
422 *Arroyo et al. 2017).*

423 *Plasma copeptin is a glycopeptide cleaved from the ADH precursor which is secreted*  
424 *into the circulation in equimolar amounts with ADH (Koistinen 2012). As determination of ADH is*  
425 *slow and unreliable, determination of the more stable copeptin enables reliable evaluation of ADH*  
426 *concentration. Measurement of copeptin has thus been investigated in recent years, particularly as*  
427 *a predictive factor for cardiovascular disease and metabolic syndrome, but also in severely ill*  
428 *patients. Studies have shown that a high copeptin level on admission predicts mortality in adult*  
429 *intensive care patients (Krychtiuk et al. 2017). Copeptin is a promising new tool that could*  
430 *potentially be used in the evaluation of prognosis and fluid therapy in acutely sick children.*

431

432 **AIM OF THE STUDY**

433 The aim of the randomized clinical study is to compare two alternative intravenous fluid products in  
434 the fluid therapy of acutely sick children. The first IV fluid is a readymade isotonic solution,  
435 Plasmalyte Glucos 50 mg/mL, which contains sodium 140 mmol/L, potassium 5 mmol/L, and  
436 chloride 98 mmol/L. The second is a 5% glucose solution which is a semi-physiological fluid in  
437 terms of sodium, containing sodium chloride 80 mmol/L and potassium chloride 20 mmol/L.

438

439 **COURSE OF THE STUDY**

440 The study is a prospective, randomized and controlled clinical treatment trial. Patients are recruited  
441 to the study by pediatric residents and specialists working in the pediatric ER. The doctors who  
442 recruit patients to the study tell about the study to the children and patients. They also hand out an  
443 information and consent document and a form with basic information for them to complete. The  
444 signed consent forms are stored in the upper cabinet in the doctor's office in the ER.

445

- 446 v. *Randomization*
- 447 The patients who have or whose parents have given a written consent to participate in
- 448 the study are randomized into two groups. The following treatments are compared:
- 449 • Isotonic fluid (readymade solution Plasmalyte Glucos 50 mg/mL, with Na 140
- 450 mmol/L, K 5 mmol/L and Cl 98 mmol/L)
- 451 • Semi-physiological fluid (G5%, to which NaCl 80 mmol/L and KCl 20 mmol/L is
- 452 added)
- 453 The current standard of care is based on a local model which has not been scientifically
- 454 evaluated and is associated with a significant possibility for calculation errors, as shown
- 455 by a survey we conducted among the physicians in our clinic. The current standard of
- 456 care is thus not comparable in this study as its safety has not been established and it is
- 457 not evidence-based.
- 458 vi. *Blinding*
- 459 This is an open label study because the endpoints can be objectively measured. Thanks
- 460 to the open label design, the treating physician is also aware of the electrolyte
- 461 concentrations of the fluids and can make adjustments to them if necessary.
- 462 vii. *Endpoints*
- 463 • Primary: hypokalemia < 3.5
- 464 • Secondary: hyponatremia (< 132), hypernatremia (> 148), weight gain, change of
- 465 maintenance fluid, added sodium and potassium, duration of fluid therapy during
- 466 hospital treatment within 7 days of admittance, admittance to intensive care, duration
- 467 of hospital treatment
- 468 • *Addition 4 Feb 2019: Secondary: effect of fluid therapy on ADH secretion*
- 469 *(copeptin), readmittance to ER and/or ward following discharge, deaths over a*
- 470 *period of 30 days*
- 471 viii. *Measures to prevent adverse effects*
- 472 Before the onset of fluid therapy, blood electrolytes are measured from venous blood
- 473 samples taken in connection with cannula insertion from all patients taking part in the
- 474 study. In all patients, electrolytes are analyzed from venous blood samples taken in the
- 475 morning while in hospital. Based on the assessment of the physician on call, electrolytes
- 476 can be measured in the evening as well, especially if the patient has repeated fluid loss
- 477 during the treatment, or if the time between the onset of fluid therapy and the blood
- 478 sampling the next morning is long. Any other additional blood samples required can be
- 479 taken as capillary samples. The treating physician has the right to withdraw
- 480 administration of study fluid and treat the patient with the fluids he/she considers best.
- 481 The treating physician may also increase or decrease the amount of electrolytes in the
- 482 fluid.
- 483 ix. *Addition 4 Feb 2019: Determination of copeptin in the assessment of fluid retention due*
- 484 *to excess sodium input. Copeptin is measured in a random sample of study patients who*
- 485 *receive IV fluid therapy. All plasma samples are frozen during the study and the random*
- 486 *sample will be retrieved from the frozen samples.*
- 487

488 **STUDY POPULATION**

489

490 *iv. Inclusion criteria:*

- 491 • Age  $\geq$  6 months and  $<$  12 years
- 492 • Need of hospital treatment and IV rehydration in any pediatric ward

493 *v. Exclusion criteria:*

- 494 • Na  $<$  130 or  $>$  150
- 495 • K  $<$  3
- 496 • Need of 10% glucose solution as initial fluid
- 497 • Diabetes
- 498 • Diabetes insipidus
- 499 • Ketoacidosis
- 500 • Kidney disease requiring dialysis
- 501 • Severe liver disease
- 502 • Metabolic disease that requires rehydration according to protocol
- 503 • Leukemia or other malignancy that requires rehydration according to protocol

504 *Addition 4 Oct 2016: Previous IV fluid therapy is not an exclusion criterion.*

505 *vi. Sample size*

506 Based on previous studies, we estimate that the prevalence of hypokalemia is about 13%  
507 in patients who receive isotonic maintenance fluids that do not contain, or contain only  
508 small amounts of potassium. In our study, a reduction in prevalence to 6% in the group  
509 where maintenance fluid therapy is given using semi-physiological fluid that contains  
510 potassium is considered clinically significant. We set alpha at 5% and power at 80%,  
511 which means that we need 275 children/group. To make sure that the final analysis  
512 includes the required number of children, we chose 305 children/group (a total of 610  
513 children) as sample size. *Addition 3/2018: We decided to increase the sample size so*  
514 *that a total of 660 subjects are recruited to the study to ensure the sufficient number of*  
515 *patients to compensate the number of drop-outs.*

516

517

518 **FOLLOW-UP AND LABORATORY SAMPLES**

- 519 • Before the onset of fluid therapy, sodium and potassium are measured from a venous blood  
520 sample taken in connection with cannula insertion from all patients taking part in the study.  
521 During fluid therapy, sodium and potassium are determined from a venous blood sample  
522 taken in the morning. The time of onset of study fluid administration differs between the  
523 study patients, which is why the venous blood samples are also taken at different times in  
524 the morning. However, in a randomized study design this is not a problem; the groups are  
525 still comparable. Based on the assessment of the physician on call, electrolytes can be  
526 measured in the evening as well, especially if the patient has repeated fluid loss during the  
527 treatment, or if the time between the onset of fluid therapy and the blood sampling the next  
528 morning is long.
- 529 • The study patients are weighed before the onset of fluid therapy, in the morning following  
530 the onset of fluid therapy, and after the fluid therapy has ended.

- 531 • Pathogens are investigated according to current practice in all patients with infections. In  
532 patients with acute gastroenteritis, the presence of adeno, rota and noro viruses in the feces  
533 is investigated. Patients with respiratory infections are investigated for the presence of  
534 influenza and RSV virus; if necessary, a more extensive viral analysis of a nasopharyngeal  
535 sample is undertaken.
- 536 • The following are recorded in the medical record: fever, oral fluid therapy, IV fluid therapy,  
537 vomiting, diarrhea and weight (every morning and at discharge). At the end of the treatment  
538 period, the recordings of oral and IV fluids are scanned into the medical record.
- 539 • Data on patients entering the study is collected regularly (weekly) by investigators from  
540 medical records and entered into SPSS.

541

## 542 **FLUID PRODUCTS AND THEIR ADMINISTRATION**

543 Plasmalyte Glucos 50 mg/mL contains sodium 140 mmol/l, potassium 5 mmol/L, chloride 98  
544 mmol/L, magnesium 1.5 mmol/L, acetate 27 mmol/L and gluconate 23 mmol/L. Plasmalyte Glucos  
545 50 mg/mL has a pH of about 7.4 (6.5–8.0). The semi-physiological fluid is made with 5% glucose  
546 with the addition of sodium chloride 80 mmol/L and potassium chloride 20 mmol/L. The amount of  
547 fluid and the infusion rate are calculated based on the child's weight using the Formula of Holliday-  
548 Segar (fluid requirement 100 mL/kg <10 kg, 1,000 mL + 50 mL/kg > 10 kg, > 20 kg 1,500 ml + 20  
549 mL/kg > 20 kg). Potential correction of dehydration is calculated based on estimated weight loss.  
550 Based on assessment by the physician on call, fluid replacement with 20 mg/kg Ringer solution  
551 may be given before the onset of study fluid administration for the study patients. *Addition 4 Oct*  
552 *2016: Other crystalloids such as physiological saline or Plasmalyte may also be used for fluid*  
553 *replacement.*

554

## 555 **STATISTICAL ANALYSIS PLAN**

556 **The primary outcome** is defined as the proportion of children with any clinically significant  
557 electrolyte disorder defined as hypokalemia < 3.5 mmol/L, hyponatremia < 132 mmol/L, or  
558 hypernatremia > 148 mmol/L within 7 days of randomization. **The main secondary outcome** is  
559 fluid retention measured by weight change (g) during hospitalization: weight (g) at discharge -  
560 weight (g) on admission. **Other secondary outcomes** are the duration of intravenous fluid therapy  
561 (hours), proportion of children requiring any change of fluid therapy, proportion of children  
562 admitted to intensive care after admission, duration of hospitalization, proportion of children with  
563 mild hyponatremia defined as plasma sodium 132-135 mmol/L, and severe hypokalemia < 3.0  
564 mmol/L. All secondary outcomes were reported within 7 days after randomization except the  
565 number of deaths within 30 days of randomization.

566 *Addition 4 Feb 2019: Post hoc analysis. Comparison of copeptin values (as a precursor of ADH)*  
567 *with a t-test in a random sample of 10% of participants at 6-24 hours, using the frozen plasma*  
568 *samples obtained during the study,*

569 *Addition 15 Nov 2019: Post hoc analysis regarding the time to the electrolyte disorder in hours*  
570 *(after noticing 7-fold risk in electrolyte disorders between groups analysis) is added for the analysis*  
571 *plan.*

572 *Addition 15 Nov 2019. Post hoc analysis regarding the proportion of children with low pH value*  
573 *<7.35, low base excess <-2.5 and low bicarbonate <21 on day 1 is added after pediatric*

574 *anesthesiologist department at Oulu Univ Hospital gave comments for the manuscript since*  
575 *acidosis and alkalosis may have an impact on the electrolyte balance.*

576

577 The occurrence of any clinically significant electrolyte disorder in children receiving isotonic fluid  
578 therapy was estimated to be at least 13% based on a previous study reporting the need of adding  
579 potassium in plasma-like fluid in children (17). We considered the difference between groups to be  
580 clinically significant if the occurrence of electrolyte disorder would be 7% lower in children  
581 receiving moderately hypotonic fluid. We set alpha error at 5% and beta error at 20%, i.e. power of  
582 80%, which resulted in 275 children/group. To make sure that the final analysis included the  
583 required number of children with measured primary outcome, we decided to recruit 300  
584 children/group.

585

586 All analyses were performed in intention-to-treat population. Only primary and secondary outcomes  
587 that were prespecified in the protocol and statistical analysis plan before study completion will be  
588 compared. As all study participants were hospitalized, missing data were rare. Differences between  
589 proportions will be compared with standard normal deviate test (SND test) and 95% CI of the  
590 difference will be given to readers. Risk ratios (RR) will be calculated for the outcomes. We will  
591 calculate the number needed to treat to avoid one patient developing a clinically significant  
592 electrolyte disorder (NNT) in children receiving semi isotonic fluid therapy presented as number  
593 needed to harm (NNH) if isotonic fluid therapy increased the risk. Continuous variables will be  
594 compared with t test and 95% CI of the difference will be given to readers. For primary and  
595 secondary outcomes, we will calculate 95% confidence intervals (CIs) of the differences. The widths  
596 of CI intervals of prespecified secondary outcomes will not be adjusted for multiplicity and  
597 therefore will not be interpreted as definite treatment effects. All analyses will be performed using  
598 IBM Statistics for Windows version 25 (Armonk, NY: IBM Corp.) and StatsDirect statistical  
599 software version 3 (StatsDirect Ltd, England). Figures were drawn using OriginPro 2018 software  
600 (OriginLab Corporation, Northampton, MA, USA).

601

## 602 **STUDY ORGANIZATION, FUNDING AND SCHEDULE**

603 The study is an independent investigator-driven study. Saara Lehtiranta, MD, is a pediatric resident.  
604 In addition to her day job, she does research on fluid therapy in children at the Department of  
605 Children and Adolescents of Oulu University Hospital under the guidance of Docent Terhi  
606 Tapiainen, Ass. Professor of Pediatrics, Oulu University Hospital. All members of the study team  
607 are employed in the units indicated on the title page. Funding is applied from various foundations to  
608 enable personal full-time research months (Saara Lehtiranta, MD). The study commenced in spring  
609 2016 and is expected to last 1.5–2 years.

610

611

## 612 **ETHICAL CONSIDERATIONS AND STUDY REGISTRATION**

613 For decades, hypotonic solutions calculated with the Holliday-Segar formula have been used in  
614 fluid therapy in children, and in many pediatric units they are still the current standard of care.  
615 However, fluid calculation is a cumbersome process that is prone to errors. In addition, cases of  
616 hyponatremia caused by hypotonic fluids have been described in the literature. In recent years, there



617 have been several randomized controlled studies on the use of isotonic fluids in pediatric patients.  
618 Based on the findings, the use of isotonic solutions has been considered safe in the maintenance  
619 fluid therapy in children, particularly IC and surgical patients. Based on this evidence, some  
620 pediatric units have already switched to using isotonic fluids in maintenance fluid therapy in all  
621 pediatric patients. Semi-physiological fluids have been commonly used in maintenance fluid  
622 therapy in children, and their use has not been associated with severe or clinically significant  
623 hyponatremia in previous studies.

624 The use of standardized fluids, i.e. isotonic readymade fluids and predetermined semi-  
625 physiological fluid as study products is well-motivated from the viewpoint of patient safety: the less  
626 the on-call physician needs to focus on calculating the amount of electrolytes to be added to fluids,  
627 the smaller the risk of miscalculation. However, there are still only few studies comparing different  
628 maintenance fluids, and in selected patient populations only. Above all, well-executed, randomized  
629 and controlled studies on maintenance fluid therapy in children with common infections are needed  
630 before deciding what kind of fluid therapy requiring less calculation should be adopted more  
631 widely.

632 Compared with current treatment, the use of the readymade fluids in the study is not  
633 expected to cause any risks, such as electrolyte impairment, longer treatment time or other  
634 complications. The study is an open label study, so the doctors treating the study patients are aware  
635 of the fluid solutions used and their electrolyte contents. The blood electrolyte levels of the study  
636 patients are monitored in accordance with the study protocol as well as whenever necessary, so that  
637 any disturbances in electrolyte levels can be addressed rapidly.

638

639 *Additions in 2016:*

- 640 1) *Ethical Committee of Oulu University Hospital reviewed the study protocol prior to study in*  
641 *2016, with a decision number EETTMK 48/2016*
- 642 2) *Finnish Medical Agency (FIMEA) reviewed and accepted the study protocol prior to the*  
643 *study in 2016, with a EUDRA-CT number 2016-002046.*
- 644 3) *Study was registered using ClinicalTrials.gov prior to the recruitment period, with number*  
645 *NCT02926989*

646

647

648 **CLINICAL SIGNIFICANCE OF THE STUDY**

649 The study provides new information about the selection and safety of IV fluids for children with  
650 common pediatric diseases, such as acute upper and lower respiratory infections and gastroenteritis.  
651 A switch to readymade solutions would also facilitate the work of on-call physicians, reduce the  
652 risk of calculation errors, and allow physicians more time to focus on patient care instead of fluid  
653 calculation.

654 *Addition 4 Feb 2019: Determination of copeptin and possible changes in copeptin*  
655 *levels during fluid therapy provide valuable additional information about the physiological effects*  
656 *of the clinical study. Copeptin levels could potentially be utilized in determining the clinical status*  
657 *of children in the ER setting and in choosing optimal fluid therapy.*

658

659

660 **REFERENCES**

661

662 Choong K, Arora S, Cheng J, Farrokhyar F, Reddy D, Thabane L, Walton JM. Hypotonic versus  
663 isotonic maintenance fluids after surgery for children: a randomized controlled trial. *Pediatrics*  
664 2011;128(5):857-66.

665

666 Foster BA, Tom D, Hill V. Hypotonic versus isotonic fluids in hospitalized children: a systematic  
667 review and meta-analysis. *J Pediatr* 2014;165(1):163-169

668

669 Friedman JN, Beck CE, DeGroot J, Geary DF, Sklansky DJ, Freedman SB. Comparison of isotonic  
670 and hypotonic intravenous maintenance fluids: a randomized clinical trial. *JAMA Pediatr*  
671 2015;169(5):445-51.

672

673 Kannan L, Lodha R, Vivekanandhan S, Bagga A, Kabra SK, Kabra M. Intravenous fluid regimen  
674 and hyponatraemia among children: a randomized controlled trial. *Pediatr Nephrol*  
675 2010;25(11):2303-9.

676

677 Kataja J. Onko jo aika muuttaa lasten ylläpitonestehoidon käytäntöä? *Suomen Lääkärilehti*  
678 2015;70(20):1403-1408.(article in Finnish)

679

680 McNab S, Duke T, South M, Babl FE, Lee KJ, Arnup SJ, Young S, Turner H, Davidson A. 140  
681 mmol/L of sodium versus 77 mmol/L of sodium in maintenance intravenous fluid therapy for  
682 children in hospital (PIMS): a randomised controlled double-blind trial. *Lancet*  
683 2015;385(9974):1190-7.

684

685 Moritz ML, Ayus JC. New aspects in the pathogenesis, prevention, and treatment of hyponatremic  
686 encephalopathy in children. *Pediatr Nephrol* 2010;25(7):1225-38.

687

688 Neville KA, Verge CF, Rosenberg AR, O'Meara MW, Walker JL. Isotonic is better than hypotonic  
689 saline for intravenous rehydration of children with gastroenteritis: a prospective randomised study.  
690 *Arch Dis Child* 2006;91(3):226-32.

691

692 Pemde HK, Dutta AK, Sodani R, Mishra K. Isotonic intravenous maintenance fluid reduces hospital  
693 acquired hyponatremia in young children with central nervous system infections. *Indian J Pediatr*  
694 2015;82(1):13-8.  
695  
696 Rey C, Los-Arcos M, Hernández A, Sánchez A, Díaz JJ, López-Herce J. Hypotonic versus isotonic  
697 maintenance fluids in critically ill children: a multicenter prospective randomized study. *Acta*  
698 *Paediatr* 2011;100(8):1138-43.  
699  
700 Saba TG, Fairbairn J, Houghton F, Laforte D, Foster BJ. A randomized controlled trial of isotonic  
701 versus hypotonic maintenance intravenous fluids in hospitalized children. *BMC Pediatr* 2011;11:82.  
702  
703 Sarnaik AP1, Meert K, Hackbarth R, Fleischmann L. Management of hyponatremic seizures in  
704 children with hypertonic saline: a safe and effective strategy. *Crit Care Med* 1991;19(6):758-62.  
705  
706 Shamim A, Afzal K, Ali SM. Safety and efficacy of isotonic (0.9%) vs. hypotonic (0.18%) saline as  
707 maintenance intravenous fluids in children: a randomized controlled trial. *Indian Pediatr*  
708 2014;51(12):969-74.  
709  
710 Wang J, Xu E, Xiao Y. Isotonic versus hypotonic maintenance IV fluids in hospitalized children: a  
711 meta-analysis. *Pediatrics* 2014;133(1):105-13.  
712  
713 Yung M, Keeley S. Randomised controlled trial of intravenous maintenance fluids. *J Paediatr Child*  
714 *Health* 2009;45(1-2):9-14

715

716 **AMENDMENTS**

717

718 *Additions in Sep 2016:*

719 *Ethical Committee of Oulu University Hospital reviewed the study protocol prior to study in 2016,*  
720 *with a decision number EETTMK 48/2016*

721 *Finnish Medical Agency (FIMEA) reviewed and accepted the study protocol prior to the study in*  
722 *2016, with a EUDRA-CT number 2016-002046.*

723 *Study was registered using ClinicalTrials.gov prior to the recruitment period, with number*  
724 *NCT02926989*

725

726 *Addition 4 Oct 2016: Previous IV fluid therapy is not an exclusion criterion*

727

728 *Addition 4 Oct 2016: Other cristalloids such as physiological saline or Plasmalyte may also be*  
729 *used for fluid replacement at ER before fluid therapy*

730

731 *Addition March 2018: We decided to increase the sample size so that a total of 660 subjects are*  
732 *recruited to the study to ensure the sufficient number of patients to compensate the number of drop-*  
733 *outs.*

734

735 ***Addition 4 Feb 2019: Measurement of copeptin and its use in fluid therapy***

736 *The optimal implementation of fluid therapy in acutely sick children is not known because fluid*  
737 *therapy is influenced by the degree of dehydration, renal function, and hormones that regulate fluid*  
738 *balance. In recent years, increasing attention has been focused on the risk of severe hyponatremia*  
739 *in sick patients who may have abnormally high secretion of antidiuretic hormone (ADH) in acute*  
740 *illness. According to this view, the use of isotonic, i.e. high-sodium fluid therapy would be safe as it*  
741 *prevents the severe hyponatremia associated with high secretion of ADH. However, based on a*  
742 *study in healthy adults, isotonic fluid therapy may lead to fluid retention and decreased diuresis*  
743 *(Van Regenmortel et al. 2017). In addition, animal studies have revealed that increased ADH level*  
744 *may mediate renal damage if dehydration is corrected with fluids that contain fructose (Garcia-*  
745 *Arroyo et al. 2017).*

746 *Plasma copeptin is a glycopeptide cleaved from the ADH precursor which is secreted*  
747 *into the circulation in equimolar amounts with ADH (Koistinen 2012). As determination of ADH is*  
748 *slow and unreliable, determination of the more stable copeptin enables reliable evaluation of ADH*  
749 *concentration. Measurement of copeptin has thus been investigated in recent years, particularly as*  
750 *a predictive factor for cardiovascular disease and metabolic syndrome, but also in severely ill*  
751 *patients. Studies have shown that a high copeptin level on admission predicts mortality in adult*  
752 *intensive care patients (Krychtiuk et al. 2017). Copeptin is a promising new tool that could*  
753 *potentially be used in the evaluation of prognosis and fluid therapy in acutely sick children.*

754

755 *Addition 4 Feb 2019: Secondary: effect of fluid therapy on ADH secretion (copeptin), readmittance*  
756 *to ER and/or ward following discharge, deaths over a period of 30 days*

757

758 *Addition 4 Feb 2019: Determination of copeptin in the assessment of fluid retention due to excess*  
759 *sodium input. Copeptin is measured in a random sample of study patients who receive IV fluid*  
760 *therapy. All plasma samples are frozen during the study and the random sample will be retrieved*  
761 *from the frozen samples.*

762

763 *Addition 4 Feb 2019: Determination of copeptin and possible changes in copeptin levels during*  
764 *fluid therapy provide valuable additional information about the physiological effects of the clinical*  
765 *study. Copeptin levels could potentially be utilized in determining the clinical status of children in*  
766 *the ER setting and in choosing optimal fluid therapy.*

767

768 *Addition 4 Feb 2019: **Post hoc analysis.** Comparison of copeptin values (as a precursor of ADH)*  
769 *with a t-test in a random sample of 10% of participants at 6-24 hours, using the frozen plasma*  
770 *samples obtained during the study,*

771

772 *Addition Aug 2019: **Full updated literature review with a summary table** is created.*

773

774 *Addition 15 Nov 2019: **Post hoc analysis** regarding the time to the electrolyte disorder in hours*  
775 *(after noticing 7-fold risk in electrolyte disorders between groups analysis) is added for the analysis*  
776 *plan.*

777

778 *Addition 15 Nov 2019. **Post hoc analysis** regarding the proportion of children with low pH value*  
779 *<7.35, low base excess <-2.5 and low bicarbonate <21 on day 1 is added after pediatric*  
780 *anesthesiologist department at Oulu Univ Hospital gave comments for the manuscript since*  
781 *acidosis and alkalosis may have an impact on the electrolyte balance.*

782
