# Supplementary material
Source: PubMed Central journal article supplement (PMC7589076)
Supplement: jamapediatr-e203383-s002.pdf [file jamapediatr-e203383-s002.pdf]

## Supplementary Online Content

Lehtiranta S, Honkila M, Kallio M, et al. Risk of electrolyte disorders in acutely ill children receiving commercially available plasmalike isotonic fluids: a randomized clinical trial. *JAMA Pediatr*. Published online October 26, 2020. doi:10.1001/jamapediatrics.2020.3383

**eTable.** Full List of Randomized Clinical Trials Comparing Isotonic Fluid Therapy and Hypotonic or Moderately Hypotonic Fluid Therapy in Children

### **eReferences**

This supplementary material has been provided by the authors to give readers additional information about their work.

**eTable.** Full List of Randomized Clinical Trials Comparing Isotonic Fluid Therapy and Hypotonic or Moderately Hypotonic Fluid Therapy in Children

| Publication<br>Reference list below    | Year | Country   | Patient<br>population                                              | Samp<br>le<br>size | Fluid therapy                                                                          | P-Na<br><135     | P-Na<br><130   | P-Na<br>>148             | P-K<br><3.5 | P-K<br><3.0 | Need for<br>additional<br>electrolytes  | Weight<br>change | Main result and conclusions                                                                      |
|----------------------------------------|------|-----------|--------------------------------------------------------------------|--------------------|----------------------------------------------------------------------------------------|------------------|----------------|--------------------------|-------------|-------------|-----------------------------------------|------------------|--------------------------------------------------------------------------------------------------|
| Álvarez <i>et al.</i> <sup>1</sup>     | 2008 | Spain     | <b>PICU</b> Mixed<br>84% surgical<br>29 d – 18 y                   | 122                | Na 140 mmol/l<br>vs.<br>Na 20-<br>100mmol/l                                            | 3/59<br>13/63    | 0/59<br>3/63   | 1/59<br>1/63             | n/a         | n/a         | n/a                                     | n/a              | Hypotonic maintenance fluid increased the risk of hyponatremia at 24h.                           |
| Yung <i>et al.</i> <sup>2</sup>        | 2009 | Australia | <b>PICU</b> Mixed<br>74% surgical<br>29 d – 18 y                   | 50                 | Na 154 mmol/l<br>vs.<br>Na 30 mmol/l<br>Normal vs<br>restricted rate                   | n/a              | n/a            | n/a                      | n/a         | n/a         | n/a                                     | n/a              | Dextrose saline (NaCl 30 mmol/L) led to a mean fall of 3 mmol/l in P-Na.                         |
| Rey <i>et al.</i> <sup>3</sup>         | 2011 | Spain     | <b>PICU</b> Mixed<br>46% surgical                                  | 125                | Na 136 mmol/l<br>vs.<br>Na 30-50<br>mmol/l<br>(+K 20 mmol/l)                           | 7/45<br>16/39    | 1/45<br>3/39   | 1/63<br>0/62             | n/a         | n/a         | n/a                                     | n/a              | Hypotonic maintenance fluids increased the incidence of hyponatremia in critically ill patients. |
| Jorro Barón <i>et al.</i> <sup>4</sup> | 2013 | Argentina | <b>PICU</b> Mixed<br>11% surgical<br>1 m – 18 y                    | 66                 | Na 154 mmol/l<br>vs.<br>Na 77 mmol/l<br>(+ K 0-20<br>mmol/l)                           | 4/31<br>5/32     | 0/31<br>1/32   | (>145)<br>1/31<br>2/32   | n/a         | n/a         | n/a                                     | n/a              | Risk for hyponatremia was not increased in either group.                                         |
| Raksha <i>et al.</i> <sup>5</sup>      | 2017 | India     | <b>PICU</b><br>Medical<br>1 m – 18 y                               | 240                | Na 154 mmol/l<br>normal rate vs.<br>Na 23 mmol/l<br>restricted rate<br>(+ K 20 mmol/l) | 10/120<br>20/120 | 2/120<br>3/120 | (>145)<br>3/120<br>0/120 | n/a         | n/a         | Hyponatremia was treated with 3% saline | n/a              | Treatment with restricted (2/3) hypotonic maintenance fluid increased incidence of hyponatremia. |
| Brazel <i>et al.</i> <sup>6</sup>      | 1996 | Australia | <b>Postoperative</b><br>(Scoliosis)<br>12.3 – 18.1 y<br>Female pts | 12                 | Na 131 mmol/l<br>(Hartmann's)<br>vs.<br>Na 30-50<br>mmol/l                             | 1/5<br>7/7       | 0/5<br>4/7     | 0/5<br>0/7               | n/a         | n/a         | n/a                                     | n/a              | Isotonic saline treatment protected patients from SIADH when undergoing surgery for scoliosis.   |

|                                      |      |           |                                                                                  |     |                                                                                                        |                  |                |                            |     |     |                                                |                    |                                                                                                                        |
|--------------------------------------|------|-----------|----------------------------------------------------------------------------------|-----|--------------------------------------------------------------------------------------------------------|------------------|----------------|----------------------------|-----|-----|------------------------------------------------|--------------------|------------------------------------------------------------------------------------------------------------------------|
| Neville <i>et al.</i> <sup>7</sup>   | 2010 | Australia | <b>Postoperative</b><br>6 m – 15 y                                               | 124 | Na 154 mmol/l<br>vs.<br>Na 77 mmol/l                                                                   | 6/62<br>19/62    | n/a            | 0/62<br>0/62               | n/a | n/a | 16/124                                         | n/a                | Electrolyte content was more important than the rate of infusion in preventing hyponatremia in postoperative patients. |
| Choong <i>et al.</i> <sup>8</sup>    | 2011 | Canada    | <b>Postoperative</b><br>6 m – 16 y                                               | 258 | Na 154 mmol/l<br>vs.<br>Na 77 mmol/l<br>(+ K 0-20<br>mmol/l)                                           | 29/128<br>53/130 | 1/128<br>8/130 | (>145)<br>4/128<br>5/130   | n/a | n/a | Change to<br>open label<br>PMS 7/128<br>17/130 | n/a                | Hypotonic solutions increased the risk of postoperative hyponatremia in children. NNT with isotonic solution 6.        |
| Coulthard <i>et al.</i> <sup>9</sup> | 2012 | Australia | <b>Postoperative</b><br>(spinal<br>instrumentation<br>or<br>craniotomy)          | 82  | Na 131mmol/l<br>normal rate vs.<br>Na 77 mmol/l<br>restricted rate<br>(+KCl 5mmol/l)                   | 0/39<br>7/40     | 0/39<br>0/40   | (>145)<br>0/39<br>0/40     | n/a | n/a | n/a<br>43-46%<br>received<br>fluid boluses     | n/a                | The plasma sodium level fell less when Na 131mmol/l was administered in comparison to 77 mmol/l.                       |
| McNab <i>et al.</i> <sup>10</sup>    | 2015 | Australia | <b>Mixed</b><br>3mo – 18y<br><b>46% surgical</b>                                 | 679 | Na 140 mmol/l<br>(Plasmalyte) vs<br>Na 77mmol/l                                                        | 12/319<br>35/322 | 2/319<br>5/322 | (>145)<br>14/319<br>18/322 | n/a | n/a | Additional<br>potassium<br>13% vs 11%          | n/a                | Plasmalyte (Na 140 mmol/l) reduced the incidence of hyponatremia                                                       |
| Saba <i>et al.</i> <sup>11</sup>     | 2011 | Canada    | <b>Mixed</b><br>3mo – 18y<br><b>57% surgical</b>                                 | 59  | Na 154mmol/l<br>vs Na 77mmol/l                                                                         | 1/16<br>1/21     | None           | (>146)<br>1/16<br>0/21     | n/a | n/a | n/a                                            | n/a                | 77mmol/l NaCl did not result in a drop of serum sodium concentration within 12 hours of fluid therapy                  |
| Serrate <i>et al.</i> <sup>12</sup>  | 2019 | Argentina | <b>General<br/>pediatric</b><br>patients<br>29 days -15 y<br><b>27% surgical</b> | 299 | Na 150 mmol/l<br>vs. Na<br>77mmol/l                                                                    | 29/151<br>12/143 | 0/151<br>5/143 | (>150)<br>None             | n/a | n/a | n/a                                            | n/a                | The incidence of hyponatremia was greater in hypotonic group                                                           |
| Friedman <i>et al.</i> <sup>13</sup> | 2015 | Canada    | <b>General<br/>pediatric</b><br>patients<br>1mo – 18 y                           | 110 | Na 154mmol/l<br>vs. Na<br>77mmol/l<br>(K 0-40mmol/l<br>by the decision<br>of responsible<br>physician) | 0/54<br>2/56     | None           | 1/54<br>1/56               | n/a | n/a | n/a                                            | 0.9kg vs.<br>0.2kg | No difference in mean sodium at 24 or 48 between the groups was observed.                                              |

|                                        |      |       |                                                       |     |                                                                                         |                        |              |                                |     |       |     |     |                                                                                                                               |
|----------------------------------------|------|-------|-------------------------------------------------------|-----|-----------------------------------------------------------------------------------------|------------------------|--------------|--------------------------------|-----|-------|-----|-----|-------------------------------------------------------------------------------------------------------------------------------|
| Kumar <i>et al.</i> <sup>14</sup>      | 2019 | India | <b>General pediatric</b> patients 3mo-5y              | 168 | Na 154mmol/l vs. Na 77mmol/l                                                            | 5/84<br>12/84          | 2/84<br>2/84 | (>145)<br>3/84<br>4/84         | n/a | n/a   | n/a | n/a | 0.45% NaCl did not result in a significantly increased risk of hyponatremia                                                   |
| Bagri <i>et al.</i> <sup>15</sup>      | 2019 | India | <b>General pediatric</b> patients 1mo-18y             | 150 | Na 154mmol/l vs Na 77mmol/l (+KCl 20mmol/l)                                             | n/a                    | 5/75<br>6/75 | (>150)<br>3/75<br>1/75         |     |       | n/a | n/a | There was a low but comparable incidence of hypo- and hypernatremia in first 12 h of hospitalization in both groups           |
| Golshekan <i>et al.</i> <sup>16</sup>  | 2016 | Iran  | <b>Pediatric gastro-enteritis</b> 6mo-14y             | 75  | Na 154mmol/l vs Na 77mmol/l<br><br>Both groups:<br>-20ml/kg NaCl bolus<br>-KCl 20mmol/l | 4/38<br>5/37           | n/a          | n/a                            |     | non e | n/a | n/a | Isotonic fluid increased plasma sodium concentration                                                                          |
| Ramanathan <i>et al.</i> <sup>17</sup> | 2016 | India | Patients with <b>severe pneumonia</b> 2mo-5y          | 119 | Na 154mmol/l vs Na 30mmol/l (+KCl 20mmol/l)                                             | 9/59<br>29/60          | 1/59<br>5/60 | (>150)<br>None                 |     |       | n/a | n/a | Isotonic maintenance fluid reduced the risk for hyponatremia                                                                  |
| Pemde <i>et al.</i> <sup>18</sup>      | 2015 | India | Patients with <b>suspected CNS</b> infection 3mo – 5y | 92  | Na 154 mmol/l vs. Na 77 mmol/l vs. Na 30 mmol/l (+KCl 20mmol/l)                         | 2/31<br>12/30<br>17/31 | 1/31<br>6/61 | (>150)<br>1/31<br>0/30<br>0/31 |     |       | n/a | n/a | Isotonic NaCl 0.9% as a intravenous maintenance fluid in children with CNS infection led to a decreased risk of hyponatremia. |

|                                     |      |               |                                                       |     |                                                                                                                                                         |                       |                      |                                |                                                 |      |     |                                                                                 |                                                                                                                |
|-------------------------------------|------|---------------|-------------------------------------------------------|-----|---------------------------------------------------------------------------------------------------------------------------------------------------------|-----------------------|----------------------|--------------------------------|-------------------------------------------------|------|-----|---------------------------------------------------------------------------------|----------------------------------------------------------------------------------------------------------------|
| Shamin <i>et al.</i> <sup>19</sup>  | 2014 | India         | <b>General pediatric patients</b><br>0.5 – 12 y       | 60  | Na 154 mmol/l at 60% maintenance rate vs. Na 30mmol/l at standard maintenance rate (+KCl 10mmol/l)                                                      | n/a                   | 10/30<br>21/30       | (>150)<br>3/30<br>0/30         |                                                 | none | n/a | Weight loss in 0.9 % NaCl group (2.6%), weight gain in NaCl 0.18 % group (2.8%) | Reduced volume isotonic fluid resulted in fewer episodes of hyponatremia                                       |
| Kannan <i>et al.</i> <sup>20</sup>  | 2010 | India         | <b>General pediatric patients</b><br>3mo – 12y        | 167 | Na 154 mmol/l at standard maintenance rate vs. Na 30mmol/l at standard maintenance rate vs. Na 30mmol/l at 2/3standard maintenance rate (+KCl 20mmol/l) | 5/58<br>13/56<br>5/53 | 1/58<br>8/56<br>2/53 | (>150)<br>2/58<br>2/56<br>4/53 | n/a                                             | n/a  |     | n/a                                                                             | A significant decrease in the occurrence of hyponatremia was observed with the use isotonic maintenance fluid. |
| Allen <i>et al.</i> <sup>21</sup>   | 2016 | US and Canada | Patients with acute <b>gastroenteritis</b><br>6mo-11y | 100 | Na 140mmol/l (Plasmalyte-A) vs. Na 154 mmol/l                                                                                                           | 1/51<br>1/49          | None                 | None                           | <b>3.0-3.5 depending on age</b><br>2/51<br>6/49 |      | n/a | n/a                                                                             | Plasmalyte led to a more rapid improvement in serum bicarbonate and dehydration score.                         |
| Neville <i>et al.</i> <sup>22</sup> | 2006 | Australia     | Patients with <b>gastroenteritis</b><br>6mo-14y       | 102 | Na 154 mmol/l vs. Na 77 mmol/l                                                                                                                          |                       |                      | None                           | n/a                                             | n/a  | n/a |                                                                                 | Isotonic fluid may have prevented hyponatremia.                                                                |

## eReferences

1. Alvarez-Montanana P, Modesto i Alapont V, Perez Ocon A, et al: The use of isotonic fluid as maintenance therapy prevents iatrogenic hyponatremia in pediatrics: A randomised, controlled open study. *Pediatr Crit Care Med* 9:589–597.
2. Yung M, Keeley S. Randomised controlled trial of intravenous maintenance fluids. *J Paediatr Child Health*. 2009;45(1-2):9-14. doi:10.1111/j.1440-1754.2007.01254.x
3. Rey C, Los-Arcos M, Hernández A, Sánchez A, Díaz JJ, López-Herce J. Hypotonic versus isotonic maintenance fluids in critically ill children: a multicenter prospective randomized study. *Acta Paediatr*. 2011;100(8):1138-1143. doi:10.1111/j.1651-2227.2011.02209.x
4. Jorro Barón FA, Meregalli CN, Rombolá VA, et al. Hypotonic versus isotonic maintenance fluids in critically ill pediatric patients: a randomized controlled trial. *Arch Argent Pediatr*. 2013;111(4):281-287. doi:10.5546/aap.2013.281
5. S K Raksha, Dakshayani B, R P. Full Volume Isotonic (0.9%) vs. Two-Thirds Volume Hypotonic (0.18%) Intravenous Maintenance Fluids in Preventing Hyponatremia in Children Admitted to Pediatric Intensive Care Unit-A Randomized Controlled Study. *J Trop Pediatr*. 2017;63(6):454-460.
6. Brazel PW, McPhee IB. Inappropriate secretion of antidiuretic hormone in postoperative scoliosis patients: the role of fluid management. *Spine* (Phila Pa 1976). 1996;21(6):724-727. doi:10.1097/00007632-199603150-00013
7. Neville KA, Sandeman DJ, Rubinstein A, Henry GM, McGlynn M, Walker JL. Prevention of hyponatremia during maintenance intravenous fluid administration: a prospective randomized study of fluid type versus fluid rate. *J Pediatr*. 2010;156(2):313-9.e92. doi:10.1016/j.jpeds.2009.07.059
8. Choong K, Arora S, Cheng J, et al. Hypotonic versus isotonic maintenance fluids after surgery for children: a randomized controlled trial. *Pediatrics*. 2011;128(5):857-866. doi:10.1542/peds.2011-0415
9. Coulthard MG, Long DA, Ullman AJ, Ware RS. A randomised controlled trial of Hartmann's solution versus half normal saline in postoperative paediatric spinal instrumentation and craniotomy patients. *Arch Dis Child*. 2012;97(6):491-496. doi:10.1136/archdischild-2011-300221
10. McNab S, Duke T, South M, et al. 140 mmol/L of sodium versus 77 mmol/L of sodium in maintenance intravenous fluid therapy for children in hospital (PIMS): a randomised controlled double-blind trial. *Lancet*. 2015;385(9974):1190-1197. doi:10.1016/S0140-6736(14)61459-8
11. Saba TG, Fairbairn J, Houghton F, Laforte D, Foster BJ. A randomized controlled trial of isotonic versus hypotonic maintenance intravenous fluids in hospitalized children. *BMC Pediatr*. 2011;11:82. Published 2011 Sep 23. doi:10.1186/1471-2431-11-82
12. Serrate AJ, Sticco NA, Rocca Rivarola M. Hypotonic and isotonic intravenous maintenance fluids in hospitalised paediatric patients: a randomised controlled trial. *BMJ Paediatr Open*. 2019;3(1):e000385. Published 2019 May 9. doi:10.1136/bmjpo-2018-000385
13. Friedman JN, Beck CE, DeGroot J, Geary DF, Sklansky DJ, Freedman SB. Comparison of isotonic and hypotonic intravenous maintenance fluids: a randomized clinical trial. *JAMA Pediatr*. 2015;169(5):445-451. doi:10.1001/jamapediatrics.2014.3809
14. Kumar M, Mitra K, Jain R. Isotonic versus hypotonic saline as maintenance intravenous fluid therapy in children under 5 years of age admitted to general paediatric wards: a randomised controlled trial. *Paediatr Int Child Health*. 2020;40(1):44-49. doi:10.1080/20469047.2019.1619059
15. Bagri NK, Saurabh VK, Basu S, Kumar A. Isotonic versus Hypotonic Intravenous Maintenance Fluids in Children: A Randomized Controlled Trial. *Indian J Pediatr*. 2019;86(11):1011-1016. doi:10.1007/s12098-019-03011-5
16. Golshekan K, Badeli H, Miri M, et al. Suitable intravenous fluid for preventing dysnatremia in children with gastroenteritis; a randomized clinical trial. *J Renal Inj Prev*. 2016;5(2):69-73. Published 2016 Apr 22. doi:10.15171/jrip.2016.15
17. Ramanathan S, Kumar P, Mishra K, Dutta AK. Isotonic versus Hypotonic Parenteral Maintenance Fluids in Very Severe Pneumonia. *Indian J Pediatr*. 2016;83(1):27-32. doi:10.1007/s12098-015-1791-6

18. Pemde HK, Dutta AK, Sodani R, Mishra K. Isotonic intravenous maintenance fluid reduces hospital acquired hyponatremia in young children with central nervous system infections. *Indian J Pediatr.* 2015;82(1):13-18. doi:10.1007/s12098-014-1436-1
19. Shamim A, Afzal K, Ali SM. Safety and efficacy of isotonic (0.9%) vs. hypotonic (0.18%) saline as maintenance intravenous fluids in children: a randomized controlled trial. *Indian Pediatr.* 2014;51(12):969-974. doi:10.1007/s13312-014-0542-5
20. Kannan L, Lodha R, Vivekanandhan S, Bagga A, Kabra SK, Kabra M. Intravenous fluid regimen and hyponatraemia among children: a randomized controlled trial. *Pediatr Nephrol.* 2010;25(11):2303-2309. doi:10.1007/s00467-010-1600-4
21. Allen CH, Goldman RD, Bhatt S, et al. A randomized trial of Plasma-Lyte A and 0.9 % sodium chloride in acute pediatric gastroenteritis. *BMC Pediatr.* 2016;16:117. Published 2016 Aug 2. doi:10.1186/s12887-016-0652-4
22. Neville KA, Verge CF, Rosenberg AR, O'Meara MW, Walker JL. Isotonic is better than hypotonic saline for intravenous rehydration of children with gastroenteritis: a prospective randomised study. *Arch Dis Child.* 2006;91(3):226-232. doi:10.1136/adc.2005.08410
