# Supplementary material
Source: PubMed Central journal article supplement (PMC7589076)
Supplement: jamapediatr-e203383-s003.pdf [file jamapediatr-e203383-s003.pdf]

## Data Sharing Statement

Lehtiranta. Risk of Electrolyte Disorders in Acutely Ill Children Receiving Commercially Available Plasmalike Isotonic Fluids. *JAMA Pediatr*. Published October 26, 2020.  
10.1001/jamapediatrics.2020.3383

### Data

**Data available:** Yes

**Data types:** Deidentified participant data

**How to access data:** For predefined clinical research purposes, the data are available from the principal investigator Terhi Tapiainen, [terhi.tapiainen@oulu.fi](mailto:terhi.tapiainen@oulu.fi)

**When available:** With publication

### Supporting Documents

**Document types:** None

### Additional Information

**Who can access the data:** The data will be made available for clinical researchers with a predefined study question.

**Types of analyses:** For predefined pediatric clinical research purposes.

**Mechanisms of data availability:** After approval of proposal
